# Supplementary material for: Stronger microbial nutrient limitations in subsoil along the precipitation gradient of agroecosystem: Insights from soil enzyme activity and stoichiometry
Source: Copernicus journal article supplement (doi:10.5194/soil-2021-140), 2022-01-27
Supplement: Supplementary file 1 [file soil-2021-140-supplement.pdf]

1 **Supplementary material**

2 **Stronger microbial nutrient limitations in subsoil along the precipitation gradient of**  
3 **agroecosystem: Insights from soil enzyme activity and stoichiometry**

4

5 Jingjing Yang <sup>a,b</sup>, Pingting Guan <sup>a</sup>, Peng Zhang <sup>b</sup>, Yunga Wu <sup>a,b</sup>, Deli Wang <sup>c</sup>, Donghui Wu

6 <sup>a,b,d,e\*</sup>

7 <sup>a</sup> *State Environmental Protection Key Laboratory of Wetland Ecology and Vegetation Restoration, School*

8 *of Environment, Northeast Normal University, Changchun 130117, China*

9 <sup>b</sup> *Key Laboratory of Wetland Ecology and Environment, Institute of Northeast Geography and Agroecology,*

10 *Chinese Academy of Sciences, Changchun 130102, China*

11 <sup>c</sup> *Institute of Grassland Science, Key Laboratory of Vegetation Ecology of the Ministry of Education, Jilin*

12 *Songnen Grassland Ecosystem National Observation and Research Station, Northeast Normal University,*

13 *Changchun 130024, China*

14 <sup>d</sup> *Key Laboratory of Vegetation Ecology, Ministry of Education, Northeast Normal University, Changchun*

15 *130024, China*

16 <sup>e</sup> *Jilin Provincial Key Laboratory of Animal Resource Conservation and Utilization, Northeast Normal*

17 *University, Changchun 130117, China*

18

19 \* Corresponding author.

20 School of Environment, Northeast Normal University, No. 2555, Jingyue Street, Changchun

21 130117, Jilin Province, China

22 E-mail address: wudonghui@neigae.ac.cn

23 **Table S1**

24 Site detail across a gradient of precipitation region.

25 **Table S2**

26 Relationships between the angle and length of vector and precipitation among soil profiles.

27 Dependent variables are vector angle and length, depth is a grouping factor with five levels,

28 and the precipitation are covariates in ANCOVA models. A significant depth  $\times$  covariate

29 interaction would indicate that the slope of the vector–precipitation relationship differs

30 among soil profiles. Depth followed by a different letter are significantly different

31 (Bonferroni,  $P < 0.05$ ).

32 **Figure S1.** A schematic diagram of enzyme methodology. Blank: 250  $\mu$ l acetate buffer.

33 Standard: 50  $\mu$ l of standard substrate and 200  $\mu$ l acetate buffer. Substrate: 50  $\mu$ l of 200  $\mu$ M

34 enzyme substrate solution in 200  $\mu$ l of acetate buffer. Sample: 50  $\mu$ l of acetate buffer and 200

35  $\mu$ l of soil sample suspension. Quench Control: 50  $\mu$ l of the standard substrate (10  $\mu$ M 4-

36 methylumbelliferyl or 7-amino-4-methylcoumarin) plus 200  $\mu$ l of soil sample suspension.

37 Assay: 50  $\mu$ l of 200  $\mu$ M enzyme substrate solution and 200  $\mu$ l of soil sample suspension.

38

**Table S1**

Site detail across a gradient of precipitation region.

| Site             | Location          | Altitude (m) | MAT (°C) | MAP (mm) | Soil type       |
|------------------|-------------------|--------------|----------|----------|-----------------|
| Changling (CL)   | 44°35'N, 123°30'E | 140          | 6.2      | 381      | Salt-alkali     |
| Sijianfang (SJF) | 44°18'N, 124°07'E | 190          | 6.2      | 416      | Light chernozem |
| Nongan (NOA)     | 44°11'N, 124°37'E | 250          | 5.5      | 493      | Chernozem       |
| Changchun (CC)   | 43°54'N, 125°13'E | 232          | 6.3      | 586      | Black soil      |
| Dongliao (DL)    | 42°54'N, 125°25'E | 310          | 5.9      | 688      | Dark brown soil |
| Longwan (LW)     | 42°22'N, 126°26'E | 670          | 5.9      | 756      | Dark brown soil |
| Baihe (BH)       | 42°23'N, 127°05'E | 780          | 4.1      | 840      | Dark brown soil |

**Table S2**

Relationships between the angle and length of vector and precipitation among soil profiles.

Dependent variables are vector angle and length, depth is a grouping factor with five levels,

and the precipitation are covariates in ANCOVA models. A significant depth  $\times$  covariate

interaction would indicate that the slope of the vector–precipitation relationship differs

among soil profiles. Depth followed by a different letter are significantly different

(Bonferroni,  $P < 0.05$ ).

| Dependent variable and covariate     | Depth (cm) |       |       |       |       |
|--------------------------------------|------------|-------|-------|-------|-------|
|                                      | 0-10       | 10-20 | 20-30 | 30-40 | 40-50 |
| vector angle $\times$ precipitation  | a          | a     | b     | b     | b     |
| vector length $\times$ precipitation |            |       | a     | a     | a     |

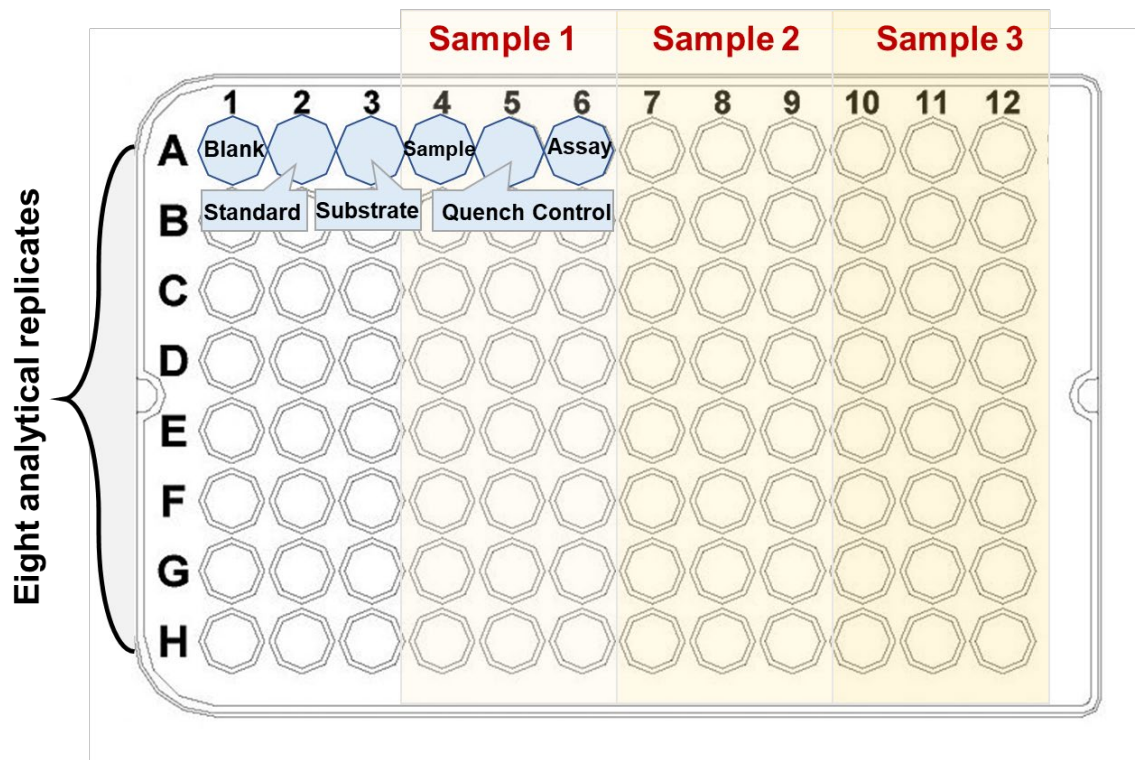

**Figure S1.** A schematic diagram of enzyme methodology. Blank: 250  $\mu$ l acetate buffer.

Standard: 50  $\mu$ l of standard substrate and 200  $\mu$ l acetate buffer. Substrate: 50  $\mu$ l of 200  $\mu$ M

enzyme substrate solution in 200  $\mu$ l of acetate buffer. Sample: 50  $\mu$ l of acetate buffer and 200

$\mu$ l of soil sample suspension. Quench Control: 50  $\mu$ l of the standard substrate (10  $\mu$ M 4-

methylumbelliferyl or 7-amino-4-methylcoumarin) plus 200  $\mu$ l of soil sample suspension.

Assay: 50  $\mu$ l of 200  $\mu$ M enzyme substrate solution and 200  $\mu$ l of soil sample suspension.
